# Supplementary material for: Synergistic effect of the herbal mixture C5E on gemcitabine treatment in PANC-1 cells
Source: PubMed Central journal article supplement — Mol Med Rep. 2021 Mar 2;23(5):315. doi: 10.3892/mmr.2021.11954 (PMC7974510; doi:10.3892/mmr.2021.11954), 2021-03-02

Figure S1. Cell viability following the treatment with C5E and/or gemcitabine. PANC-1 cells were treated with (A) C5E, (B) gemcitabine and C5E and (C) gemcitabine for 72 h. Data are expressed as the mean  $\pm$  SEM from  $\geq 3$  independent experiments. \* $P < 0.05$ , \*\* $P < 0.01$  vs. control.

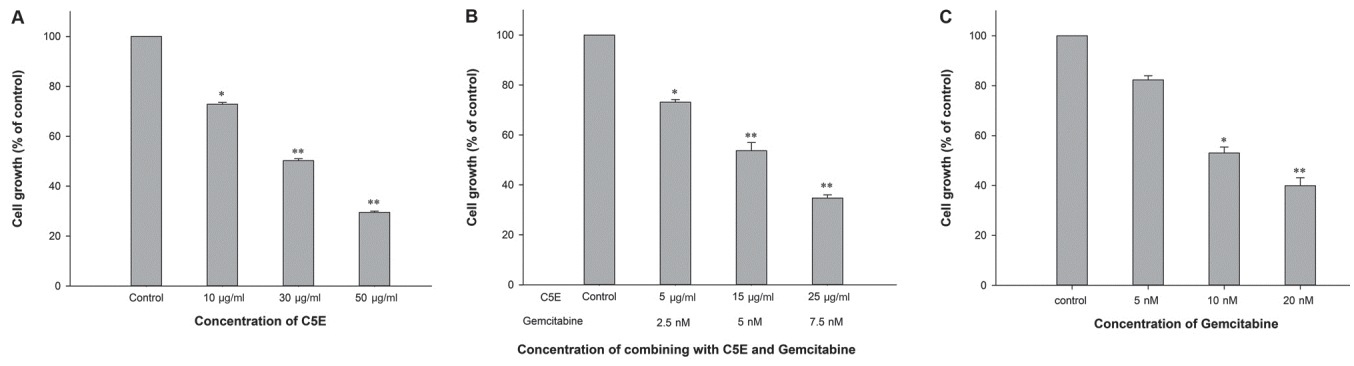

Supplement: Supplementary_Data.pdf [file Supplementary_Data.pdf]
